# Supplementary material for: Hypothermia for encephalopathy in low and middle-income countries (HELIX): study protocol for a randomised controlled trial
Source: PubMed Central journal article supplement (PMC5604260; doi:10.1186/s13063-017-2165-3), 2017-09-18

Figure 1: Outline CONSORT diagram:

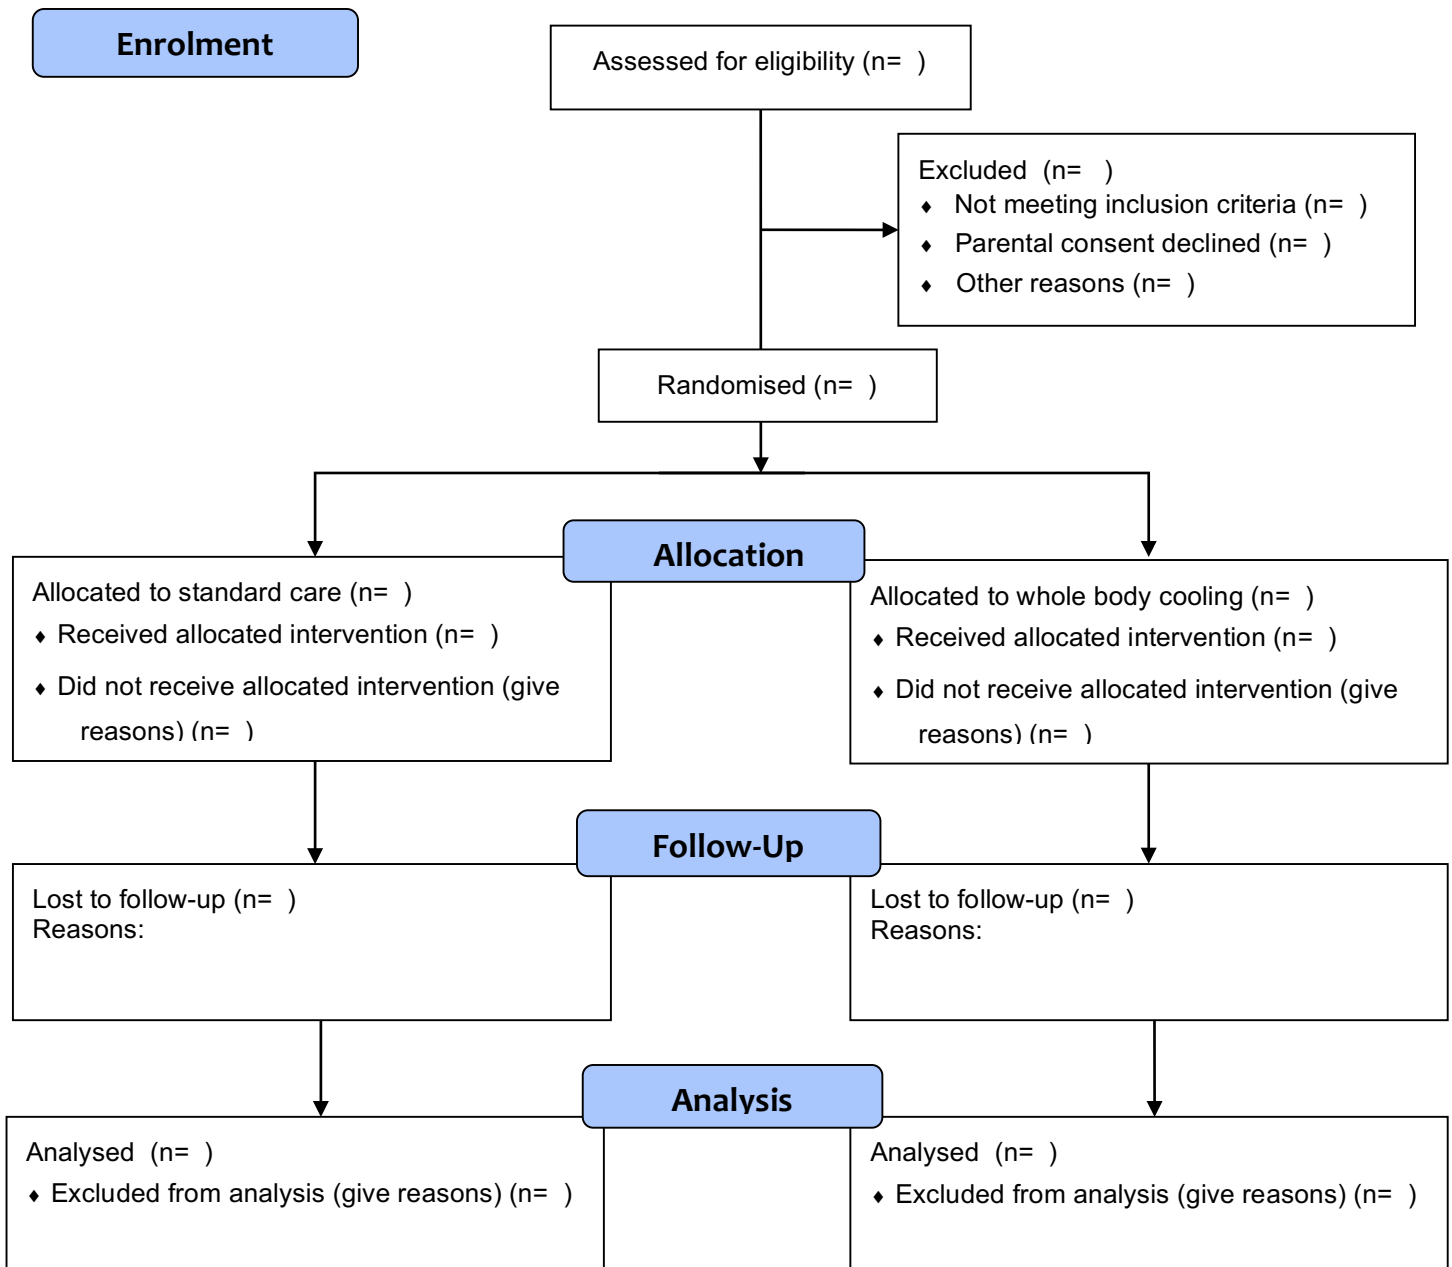

Supplement: 13063_2017_2165_MOESM3_ESM.pdf [file 13063_2017_2165_MOESM3_ESM.pdf]
